# Supplementary material for: Sick leave and medication use in pregnancy: a European web-based study
Source: PubMed Central journal article supplement — BMJ Open. 2017 Aug 3;7(8):e014934. doi: 10.1136/bmjopen-2016-014934 (PMC5724093; doi:10.1136/bmjopen-2016-014934), 2017-08-03
Supplement: bmjopen-2016-014934supp002.pdf [file bmjopen-2016-014934supp002.pdf]

**Supplementary Table 1** Reasons for sick leave.

| Category                               | Free-text entries                                                                                                                                                                                                                                                                                                                                                                                                                                                                                                                                                                                                            |
|----------------------------------------|------------------------------------------------------------------------------------------------------------------------------------------------------------------------------------------------------------------------------------------------------------------------------------------------------------------------------------------------------------------------------------------------------------------------------------------------------------------------------------------------------------------------------------------------------------------------------------------------------------------------------|
| Pregnancy complications, n=896 (26.5%) | Epilepsy, carpal tunnel syndrome, cervix insufficiency, complications, gestosis, glucose intolerance, HELLP (hemolysis, elevated liver enzymes, and low platelet count) syndrome, hematoma, in vitro fertilization, high maternal age, leakage of amniotic fluid, low placenta, low position of the baby, malnutrition of the fetus, maternal diabetes, medical procedure, multiple pregnancy, obesity, prenatal, previous abortion, ovarian hyperstimulation, placenta abruption, placenta previa, Rhesus-disease, shortened cervix, swollen legs, threatened miscarriage, thrombophilia, varicose veins, water in the body |
| Other, n=447 (13.2%)                   | Allergy, anemia, angina, appendicitis, asthenia, cough, death in the family, difficulties walking, endometriosis, fever, end of pregnancy, gastritis, hernia, hospitalization, hypertonia, inflammation in the legs, kidney stone, mononucleosis, operation, ovarian cysts, poisoning, stomach upset, streptococcus, vaginal inflammation, viral infection, weight loss                                                                                                                                                                                                                                                      |
| Respiratory infections, n=413 (12.2%)  | Bacterial infections of the airway, bronchitis, chest infection, cold virus, flu, infection of the lungs, influenza, laryngitis, pneumonia, rhinitis, sinusitis, sinus trouble, throat infection, tonsillitis, upper respiratory infection                                                                                                                                                                                                                                                                                                                                                                                   |
| Premature contractions, n=343 (11.9%)  | Increased uterine tone, preterm labor, suspicion of premature birth                                                                                                                                                                                                                                                                                                                                                                                                                                                                                                                                                          |
| Work-related, n=311 (9.2%)             | Accident at work, difficulty sitting for a long time, harmful working conditions, hard work, heavy lifting, night work, overtime work, too much standing at work, too long commuting to work, stressful job, working in kindergarten                                                                                                                                                                                                                                                                                                                                                                                         |
| Other pain, n=295 (9%)                 | Headache, joint pain, migraine, neuralgia, sciatica                                                                                                                                                                                                                                                                                                                                                                                                                                                                                                                                                                          |
| Mental illnesses, n=93 (2.7%)          | Anorexia, anxiety, depression, mental stress                                                                                                                                                                                                                                                                                                                                                                                                                                                                                                                                                                                 |
| Urinary tract infections, n=36 (1.1%)  | Includes pyelonephritis and protein in the urine                                                                                                                                                                                                                                                                                                                                                                                                                                                                                                                                                                             |

A woman could report several reasons for being on sick leave during pregnancy. The remaining categories were: pain in the neck, back, or pelvic girdle (16.2%); nausea/vomiting (16.0%); sleep (7.8%); fatigue (4.6%); vaginal bleeding (4.5%); low blood pressure/dizziness (3.8%); and high blood pressure/preeclampsia (3.6%).
