# Supplementary material for: Sick leave and medication use in pregnancy: a European web-based study
Source: PubMed Central journal article supplement — BMJ Open. 2017 Aug 3;7(8):e014934. doi: 10.1136/bmjopen-2016-014934 (PMC5724093; doi:10.1136/bmjopen-2016-014934), 2017-08-03
Supplement: bmjopen-2016-014934supp003.pdf [file bmjopen-2016-014934supp003.pdf]

**Supplementary Table 2** Descriptions of maternity leave in each participating country according to weeks prior to childbirth.

| Country               | Maternity leave                                                                                             | Weeks before expected date of birth | Trimester |
|-----------------------|-------------------------------------------------------------------------------------------------------------|-------------------------------------|-----------|
| <b>Croatia</b>        | 28 days before the expected date of birth (45 days if there are complications resulting from the pregnancy) | 6.4                                 | 3         |
| <b>Finland</b>        | 50-30 days before the expected date of childbirth                                                           | 7.1                                 | 3         |
| <b>France</b>         | Six weeks before                                                                                            | 6                                   | 3         |
| <b>Italy</b>          | Two months before                                                                                           | 8                                   | 3         |
| <b>Norway</b>         | 3 weeks before                                                                                              | 3                                   | 3         |
| <b>Poland</b>         | After childbirth                                                                                            | 0                                   | -         |
| <b>Russia</b>         | 70 days before                                                                                              | 10                                  | 3         |
| <b>Serbia</b>         | 28 days before (first and second child)                                                                     | 4                                   | 3         |
| <b>Slovenia</b>       | 28 days before                                                                                              | 4                                   | 3         |
| <b>Sweden</b>         | 60 days before                                                                                              | 8.6                                 | 3         |
| <b>Switzerland</b>    | up to 196 francs, is paid for up to 98 days (14 weeks) after childbirth                                     | 0                                   | -         |
| <b>United Kingdom</b> | Maternity allowance: 15 weeks before                                                                        | 15                                  | 3         |
|                       | Statutory maternity pay after childbirth                                                                    |                                     |           |
