# Supplementary material for: Sick leave and medication use in pregnancy: a European web-based study
Source: PubMed Central journal article supplement — BMJ Open. 2017 Aug 3;7(8):e014934. doi: 10.1136/bmjopen-2016-014934 (PMC5724093; doi:10.1136/bmjopen-2016-014934), 2017-08-03
Supplement: bmjopen-2016-014934supp004.pdf [file bmjopen-2016-014934supp004.pdf]

**Supplementary Table 3** Maternal health and lifestyle factors, sociodemographic characteristics, and sick leave categorization according to the country of residence among pregnant women and new mothers.

| Independent variables                                | Total population, n=6686 | Pregnant women, n=3486 | New mothers, n=3200 | Pregnant women vs new mothers |
|------------------------------------------------------|--------------------------|------------------------|---------------------|-------------------------------|
| <b>Health and lifestyle factors</b>                  | n (%)                    | n (%)                  | n (%)               | p-value                       |
| <b>Alcohol in pregnancy*</b>                         |                          |                        |                     |                               |
| Yes                                                  | 1069 (16.0)              | 494 (14.2)             | 575 (18.0)          | <0.001                        |
| No                                                   | 5562 (83.2)              | 2958 (84.9)            | 2604 (81.4)         |                               |
| <b>Smoking in pregnancy*</b>                         |                          |                        |                     |                               |
| Yes                                                  | 539 (8.1)                | 268 (7.7)              | 271 (8.5)           | 0.243                         |
| No                                                   | 6133 (91.7)              | 3210 (92.1)            | 2923 (91.3)         |                               |
| <b>Pregnant after infertility treatment</b>          |                          |                        |                     |                               |
| Yes                                                  | 476 (7.1)                | 269 (7.7)              | 207 (6.5)           | 0.047                         |
| No                                                   | 6210 (92.9)              | 3217 (92.3)            | 2993 (93.5)         |                               |
| <b>Folic acid use*</b>                               |                          |                        |                     |                               |
| Yes                                                  | 6151 (92.6)              | 3199 (92.4)            | 2952 (92.9)         | 0.449                         |
| No                                                   | 489 (7.4)                | 263 (7.6)              | 226 (7.1)           |                               |
| <b>Medication for chronic indications</b>            |                          |                        |                     |                               |
| Yes                                                  | 1371 (20.5)              | 720 (20.7)             | 651 (20.3)          | 0.754                         |
| No                                                   | 5315 (79.5)              | 2766 (79.4)            | 2549 (79.7)         |                               |
| <b>Medication for acute indications</b>              |                          |                        |                     | <0.001                        |
| Yes                                                  | 5254 (78.6)              | 2610 (74.9)            | 2644 (82.6)         |                               |
| No                                                   | 1432 (21.4)              | 876 (25.1)             | 556 (17.4)          |                               |
| <b>Number of acute conditions</b>                    |                          |                        |                     |                               |
| Mean (SD), range 0-10                                | 4.2 (1.6)                | 4.2 (1.6)              | 4.1 (1.6)           | <0.001                        |
| <b>Chronic conditions**</b>                          |                          |                        |                     |                               |
| No chronic conditions                                | 5279 (79.0)              | 2762 (79.2)            | 2517 (78.7)         | 0.828                         |
| Somatic conditions                                   | 1167 (17.5)              | 599 (17.2)             | 568 (17.8)          |                               |
| Mental conditions                                    | 240 (3.6)                | 125 (3.6)              | 115 (3.6)           |                               |
| <b>Country of residence***</b>                       |                          |                        |                     |                               |
| <b>Sick leave policy***</b>                          |                          |                        |                     |                               |
| High                                                 | 1179 (17.6)              | 674 (19.3)             | 505 (15.8)          | <0.001                        |
| Medium                                               | 3128 (46.8)              | 1536 (44.1)            | 1592 (49.8)         |                               |
| Low                                                  | 2379 (35.6)              | 1276 (36.6)            | 1103 (34.5)         |                               |
| <b>Region</b>                                        |                          |                        |                     |                               |
| Northern Europe                                      | 2351 (35.2)              | 1349 (38.7)            | 1002 (31.3)         | <0.001                        |
| Eastern Europe                                       | 1956 (29.3)              | 861 (24.7)             | 1095 (34.2)         |                               |
| Western Europe                                       | 2379 (35.6)              | 1276 (36.3)            | 1103 (34.5)         |                               |
| <b>Sociodemographic and maternal characteristics</b> |                          |                        |                     |                               |
| <b>Maternal age (years)</b>                          |                          |                        |                     |                               |
| ≤20                                                  | 168 (2.5)                | 112 (3.2)              | 56 (1.8)            | <0.001                        |
| 21-30                                                | 3704 (55.4)              | 1974 (56.6)            | 1730 (54.1)         |                               |
| 31-40                                                | 2698 (40.4)              | 1351 (38.8)            | 1347 (42.1)         |                               |
| ≥41                                                  | 116 (1.7)                | 49 (1.4)               | 67 (2.1)            |                               |
| <b>Marital status</b>                                |                          |                        |                     |                               |
| Married/cohabitant                                   | 6375 (95.4)              | 3333 (95.6)            | 3042 (95.1)         | 0.287                         |
| Single/divorced/other                                | 311 (4.7)                | 153 (4.4)              | 158 (4.9)           |                               |

|                                   |             |             |             |        |
|-----------------------------------|-------------|-------------|-------------|--------|
| <b>Employment*</b>                |             |             |             |        |
| Student                           | 695 (10.4)  | 342 (9.8)   | 353 (11.0)  | 0.014  |
| Healthcare personnel              | 1088 (16.3) | 607 (17.4)  | 481 (15.0)  |        |
| Employed in other sectors         | 4893 (73.2) | 2530 (72.6) | 2363 (73.8) |        |
| <b>Highest level of education</b> |             |             |             |        |
| Primary school                    | 191 (2.9)   | 96 (2.8)    | 95 (2.9)    | 0.858  |
| High-school                       | 1736 (26.0) | 916 (26.3)  | 820 (25.6)  |        |
| University or collage             | 3985 (59.6) | 2077 (59.6) | 1908 (59.6) |        |
| Other education                   | 774 (11.6)  | 397 (11.4)  | 377 (11.8)  |        |
| <b>Primiparity</b>                |             |             |             |        |
| Yes                               | 3603 (53.9) | 2085 (59.8) | 1518 (47.4) | <0.001 |
| No                                | 3083 (46.1) | 1401 (40.2) | 1682 (52.6) |        |
| <b>Pregnancy planned*</b>         |             |             |             |        |
| Yes                               | 4657 (69.7) | 2443 (70.1) | 2214 (69.2) | 0.076  |
| No, but expected                  | 1491 (22.3) | 788 (22.6)  | 703 (22.0)  |        |
| No                                | 519 (7.8)   | 246 (7.1)   | 273 (8.5)   |        |

\*Total numbers do not add up due to missing values: Folic acid n=46 (0.7%), employment n=10 (0.2%), alcohol in pregnancy n=55 (0.8%), smoking in pregnancy n=14 (0.2%), and pregnancy planned n=19 (0.3%).

\*\*Chronic disorders were categorized as no conditions, somatic conditions only (allergy, asthma, diabetes, hypothyroidism, cardiovascular diseases, and rheumatic disorders), and any mood disorders (anxiety and/or depression), i.e. women with both somatic and mood disorders were categorized in the latter group.

\*\*\***High:** Norway, **Medium:** Croatia, Finland, Poland, Russia, Serbia, Slovenia, and Sweden, and **Low:** Italy, France, the United Kingdom, and Switzerland.
