# Supplementary material for: Sick leave and medication use in pregnancy: a European web-based study
Source: PubMed Central journal article supplement — BMJ Open. 2017 Aug 3;7(8):e014934. doi: 10.1136/bmjopen-2016-014934 (PMC5724093; doi:10.1136/bmjopen-2016-014934), 2017-08-03
Supplement: bmjopen-2016-014934supp005.pdf [file bmjopen-2016-014934supp005.pdf]

**Supplementary Table 4** Maternal status of the women at the time of answering the questionnaire in each participating country.

| Country        | New mothers<br>(n=3200) | Pregnant women (n=3486) |                           |                           |                           |              |
|----------------|-------------------------|-------------------------|---------------------------|---------------------------|---------------------------|--------------|
|                | Total                   | Total                   | 1 <sup>st</sup> trimester | 2 <sup>nd</sup> trimester | 3 <sup>rd</sup> trimester | Average GW   |
|                | n                       | n                       | n (%)                     | n (%)                     | n (%)                     | Week (range) |
| Croatia        | 144                     | 93                      | 24 (25.8)                 | 30 (32.3)                 | 39 (41.9)                 | 22 (4-40)    |
| Finland        | 145                     | 293                     | 38 (13.0)                 | 107 (36.5)                | 148 (50.5)                | 24 (5-42)    |
| France         | 94                      | 193                     | 45 (23.2)                 | 64 (33.2)                 | 84 (43.5)                 | 22 (1-40)    |
| Italy          | 227                     | 493                     | 122 (24.8)                | 206 (41.8)                | 165 (33.5)                | 20 (2-41)    |
| Norway         | 505                     | 674                     | 188 (27.9)                | 204 (30.3)                | 282 (41.8)                | 21 (1-41)    |
| Poland         | 248                     | 285                     | 50 (17.5)                 | 105 (36.8)                | 130 (45.6)                | 23 (1-41)    |
| Russia         | 553                     | 325                     | 70 (21.5)                 | 88 (27.1)                 | 167 (51.4)                | 24 (1-41)    |
| Serbia         | 108                     | 65                      | 5 (7.7)                   | 25 (38.5)                 | 35 (53.9)                 | 25 (5-39)    |
| Slovenia       | 42                      | 93                      | 24 (25.8)                 | 32 (34.4)                 | 37 (39.8)                 | 21 (5-41)    |
| Sweden         | 352                     | 382                     | 90 (23.6)                 | 124 (32.5)                | 168 (44.0)                | 22 (4-42)    |
| Switzerland    | 226                     | 260                     | 52 (20.0)                 | 84 (32.3)                 | 124 (47.7)                | 23 (4-41)    |
| United Kingdom | 556                     | 330                     | 16 (4.9)                  | 108 (32.7)                | 206 (62.4)                | 27 (3-41)    |

GW = Gestational week.
