# Supplementary material for: Sick leave and medication use in pregnancy: a European web-based study
Source: PubMed Central journal article supplement — BMJ Open. 2017 Aug 3;7(8):e014934. doi: 10.1136/bmjopen-2016-014934 (PMC5724093; doi:10.1136/bmjopen-2016-014934), 2017-08-03
Supplement: bmjopen-2016-014934supp006.pdf [file bmjopen-2016-014934supp006.pdf]

**Supplementary Table 5** Prevalence overall and of extensions of sick leave and the top three reasons for sick leave in each country.

| Country of residence   | Total sick leave | Sick leave in $\geq 2$ trimesters | Most frequent reason for sick leave                                                                               |
|------------------------|------------------|-----------------------------------|-------------------------------------------------------------------------------------------------------------------|
|                        | % (n)            | % (n)                             | Reason (%)                                                                                                        |
| <b>Eastern Europe</b>  |                  |                                   |                                                                                                                   |
| Poland                 | 71.3 (355)       | 39.4 (140)                        | Pregnancy complications (27.6)<br>Due to work (20.8)<br>Other (13.7)                                              |
| Croatia                | 63.7 (145)       | 35.2 (51)                         | Pregnancy complications (43.7)<br>NVP (11.3)<br>Vaginal bleeding (10.6)                                           |
| Serbia                 | 62.4 (93)        | 38.7 (36)                         | Pregnancy complications (26.9)<br>Other (19.4)<br>Due to work (15.7)                                              |
| Slovenia               | 51.1 (68)        | 27.9 (19)                         | Pregnancy complications (33.3)<br>Vaginal bleeding (18.8)<br>Respiratory infections & other (11.6)                |
| Russia                 | 50.6 (128)       | 30.1 (128)                        | Pregnancy complications (46.2)<br>Respiratory infections (32.9)<br>Premature contractions (8.1)                   |
| <b>Northern Europe</b> |                  |                                   |                                                                                                                   |
| Norway                 | 62.4 (724)       | 43.2 (313)                        | Pain in the neck, back, or pelvic girdle (42.9)<br>NVP (29.5)<br>Sleeping problems (16.4)                         |
| Finland                | 56.8 (248)       | 35.9 (89)                         | Respiratory infections (23.3)<br>Premature contractions (22.9)<br>Pain in the neck, back, or pelvic girdle (20.5) |
| Sweden                 | 31.7 (230)       | 31.3 (72)                         | Pregnancy complications (31.3)<br>NVP (22.8)<br>Pain in the neck, back, or pelvic girdle (10.3)                   |
| <b>Western Europe</b>  |                  |                                   |                                                                                                                   |
| France                 | 56.1 (157)       | 26.8 (42)                         | Premature contractions (22.2)<br>Sleeping problems (19.3)<br>Pain in the neck, back, or pelvic girdle (13.0)      |
| Switzerland            | 49.4 (233)       | 15.0 (35)                         | Premature contractions (23.6)<br>Pregnancy complications (20.0)<br>Other (16.7)                                   |
| Italy                  | 42.5 (284)       | 27.1 (77)                         | Pregnancy complications (34.0)<br>NVP (11.8)<br>Respiratory infection (10.4)                                      |
| The UK                 | 34.8 (302)       | 30.8 (93)                         | NVP (33.8)<br>Respiratory infections (22.1)<br>Other pain (16.9)                                                  |

The UK = United Kingdom; NVP = nausea and vomiting
